# Supplementary material for: What Could and Should Ecological Civilization Education Be?
Source: MDPI journal article supplement (doi:10.3390/su132111735), 2021-10-24
Supplement: s1 [file s1]

**Appendix – Supplementary Material**

The appendix contains supplementary tables referenced in the main text.

*Contents:*

Table S1. The comparison of different frameworks of learning outcomes in environmental education

Table S1. The comparison of different frameworks of learning outcomes in environmental education

| AMFs as extended EE outcomes [22,26,27] |                         |                                                       | EE21 [23]                                                                                                        | Positive youth development Assets [19]                                                                                                                                                                                                                                    | EE and K-12 student outcomes [24]                                                                                                                                                                                                                                                                                                                                                                                                                                                                                                                                                                                                                                                        | Advancing Environmental Education Practice [25]             |
|-----------------------------------------|-------------------------|-------------------------------------------------------|------------------------------------------------------------------------------------------------------------------|---------------------------------------------------------------------------------------------------------------------------------------------------------------------------------------------------------------------------------------------------------------------------|------------------------------------------------------------------------------------------------------------------------------------------------------------------------------------------------------------------------------------------------------------------------------------------------------------------------------------------------------------------------------------------------------------------------------------------------------------------------------------------------------------------------------------------------------------------------------------------------------------------------------------------------------------------------------------------|-------------------------------------------------------------|
| Environmental learning                  | Environmental awareness | The environment                                       | Environmental Attitudes: Sensitivity towards the environment                                                     |                                                                                                                                                                                                                                                                           | Environmental awareness, Environmental sensitivity                                                                                                                                                                                                                                                                                                                                                                                                                                                                                                                                                                                                                                       |                                                             |
|                                         |                         | Environmental problems                                |                                                                                                                  |                                                                                                                                                                                                                                                                           | Environmental issue awareness                                                                                                                                                                                                                                                                                                                                                                                                                                                                                                                                                                                                                                                            |                                                             |
|                                         |                         | Environmental protection<br>Environmental exploration |                                                                                                                  |                                                                                                                                                                                                                                                                           | Awareness of global connections, Awareness of social activism                                                                                                                                                                                                                                                                                                                                                                                                                                                                                                                                                                                                                            |                                                             |
|                                         | Environmental knowledge | The environment                                       | Learning: Knowledge regarding the interconnectedness and interdependence between human and environmental systems | Intellectual development: Content knowledge (e.g., energy efficiency, plant science, earth science, butterfly metamorphosis)                                                                                                                                              | Environmental knowledge, Ecological knowledge, Chemistry knowledge, Conceptualizations of the environment, Geography content, Science content, Academic achievement, Action competence, Mental models                                                                                                                                                                                                                                                                                                                                                                                                                                                                                    | Knowledge, System knowledge                                 |
|                                         |                         | Environmental problems                                |                                                                                                                  |                                                                                                                                                                                                                                                                           | Knowledge of environmental issues, Knowledge of health effects of inhalants, Knowledge of health effects of pollution, Risk knowledge, Academic achievement, Action competence                                                                                                                                                                                                                                                                                                                                                                                                                                                                                                           | Knowledge, System knowledge                                 |
|                                         |                         | Environmental protection<br>Environmental exploration |                                                                                                                  |                                                                                                                                                                                                                                                                           | Perceived knowledge of action, Career knowledge, Academic achievement, Action competence<br>Perceived knowledge of action, Career knowledge, Understanding of science methods, Academic achievement, Action competence                                                                                                                                                                                                                                                                                                                                                                                                                                                                   |                                                             |
|                                         | Environmental skills    | Environmental protection                              | 21st Century Skills: Critical thinking and problem solving                                                       | Physical development: Healthy habits (e.g., nutrition, fitness); health risk management (e.g., protecting self ‘from the wrong’)<br>Intellectual development: knowledge of vocational skills (e.g., video production, conducting scientific experiments, public speaking) | Knowledge for action, Knowledge of citizen action skills, Knowledge of environmental actions, Knowledge of environmental action skills, Skill knowledge, Environmental problem solving, Monitoring environmental problems, Decision-making skills, Critical thinking, Perceived skill in use of action skills, Problem-solving, Systems thinking, Action planning, Analytical skills, Career planning, Computer skills, Cyclic thinking, Higher-order thinking skills, Internet skills, Issue analysis, Issue evaluation, Issue identification, Metacognitive skills, Reading skills, Self-directed learning, Technology skills, Writing skills, Academic achievement, Action competence | Thinking, Action-related knowledge, Effectiveness knowledge |
|                                         |                         | Environmental exploration                             | 21st Century Skills: Critical thinking and problem solving                                                       | Intellectual development: knowledge of vocational skills (e.g., video production, conducting scientific experiments, public speaking)                                                                                                                                     | Knowledge for action, Knowledge of citizen action skills, Knowledge of environmental actions, Knowledge of environmental action skills, Skill knowledge, Fishing skills, Gardening skills, Geography skills, Land subsistence skills, Outdoor skills, Research skills, Safety skills, Science process skills, Decision-making skills,                                                                                                                                                                                                                                                                                                                                                    | Thinking, Action-related knowledge, Effectiveness knowledge |

|                         |                           |                                                                                                                                                                                                                                    |                                                                                                                                                                                        |                                                                                                                                                                                                                                                                                                                                                                                                                                                              |                                                                                                |
|-------------------------|---------------------------|------------------------------------------------------------------------------------------------------------------------------------------------------------------------------------------------------------------------------------|----------------------------------------------------------------------------------------------------------------------------------------------------------------------------------------|--------------------------------------------------------------------------------------------------------------------------------------------------------------------------------------------------------------------------------------------------------------------------------------------------------------------------------------------------------------------------------------------------------------------------------------------------------------|------------------------------------------------------------------------------------------------|
|                         |                           |                                                                                                                                                                                                                                    |                                                                                                                                                                                        | Critical thinking, Perceived skill in use of action skills, Problem-solving, Systems thinking, Action planning, Analytical skills, Career planning, Computer skills, Cyclic thinking, Higher-order thinking skills, Internet skills, Issue analysis, Issue evaluation, Issue identification, Metacognitive skills, Reading skills, Self-directed learning, Technology skills, Writing skills, Academic achievement, Action competence                        |                                                                                                |
| Environmental attitudes | The environment           | Place connection: The development of appreciation for and positive personal relationships with the physical location and its story<br>Environmental Attitudes: concern, and positive dispositions towards the environment          |                                                                                                                                                                                        | Environmental perceptions, Environmental attitudes, Environmental concern, Preservation values, Task value, Utilization values, Value of nature, Connectedness with nature, Sense of place, Connection to land, Environmental identity, Relationship to environment, Attitudes toward school, Attitudes toward computers, Attitudes toward the Internet, Attitudes toward traditional teaching, Reinforcing factors, Academic achievement, Action competence | Values, Beliefs, and Attitudes, Nature Connectedness, Sense of Place, Identity, Personal Norms |
|                         | Environmental problems    |                                                                                                                                                                                                                                    |                                                                                                                                                                                        | Attitudes toward inhalants, Priorities for resource management, Risk attitudes, Reinforcing factors, Academic achievement, Action competence                                                                                                                                                                                                                                                                                                                 |                                                                                                |
|                         | Environmental protection  |                                                                                                                                                                                                                                    | Intellectual development: job preparation, value of hard work                                                                                                                          | Civic responsibility, Environmental responsibility, Personal responsibility to manage risks, Sense of environmental stewardship, Reinforcing factors, Academic achievement, Action competence                                                                                                                                                                                                                                                                |                                                                                                |
|                         | Environmental exploration | Interest in Learning: Enhanced curiosity, increased interest in learning about science and the environment                                                                                                                         | Intellectual development: job preparation, value of hard work                                                                                                                          | Interest in science, Science attitudes, Attitudes toward experiential learning, Interest in chemistry, Interest in environmental issue under study, Interest in fishing, Interest in gardening, Interest in geography, Interest in learning and discovery, Interest in natural world, Reinforcing factors, Academic achievement, Action competence                                                                                                           |                                                                                                |
| Environmental behaviors | Environmental protection  | Actions: Environmental Stewardship: Motivations to perform stewardship related behaviors<br>Actions: Cooperation/Collaboration: Motivation to collaborate more with others<br>Actions: School: Motivation to work harder in school | Physical development: Healthy habits (e.g., nutrition, fitness); health risk management (e.g., protecting self 'from the wrong')<br>Social development: commitment to civic engagement | Environmental behavioral intentions, Personal commitment to aquatic environments, Environmental behavior, Water conservation, Battery recycling, Energy savings and carbon emissions reduction, Academic achievement, Action competence, Environmental stewardship                                                                                                                                                                                           | Environmental Behaviors<br>Collective Environmental Action                                     |
|                         | Environmental exploration | Actions: Cooperation/Collaboration: Motivation to collaborate more with others                                                                                                                                                     | Social development: commitment to civic engagement                                                                                                                                     | Environmental behavioral intentions, Personal commitment to aquatic environments, Environmental behavior, Fishing participation, Academic achievement, Action competence, Environmental stewardship                                                                                                                                                                                                                                                          | Environmental Behaviors<br>Collective Environmental Action                                     |

|                           |                                            |                                                                                                          |                                                                                                                                                                                                                                                                                                                                                                                                                                                                                                                                                                      |                                                                                                                                                                                                                                                     |                                                                 |                |
|---------------------------|--------------------------------------------|----------------------------------------------------------------------------------------------------------|----------------------------------------------------------------------------------------------------------------------------------------------------------------------------------------------------------------------------------------------------------------------------------------------------------------------------------------------------------------------------------------------------------------------------------------------------------------------------------------------------------------------------------------------------------------------|-----------------------------------------------------------------------------------------------------------------------------------------------------------------------------------------------------------------------------------------------------|-----------------------------------------------------------------|----------------|
|                           |                                            | <b>Actions: School:</b> Motivation to work harder in school                                              |                                                                                                                                                                                                                                                                                                                                                                                                                                                                                                                                                                      |                                                                                                                                                                                                                                                     |                                                                 |                |
| <b>Social interaction</b> | <b>Social skills</b>                       | Interpersonal networks                                                                                   |                                                                                                                                                                                                                                                                                                                                                                                                                                                                                                                                                                      |                                                                                                                                                                                                                                                     |                                                                 | Social Capital |
|                           |                                            | Communication skills                                                                                     | <b>21st Century Skills:</b> communication                                                                                                                                                                                                                                                                                                                                                                                                                                                                                                                            | <b>Social development:</b> ability to navigate in multiple cultural contexts (e.g., when to ‘talk street and talk correctly’)                                                                                                                       | Social skills, Oral communication                               |                |
|                           |                                            | Teamwork skills                                                                                          | <b>21st Century Skills:</b> collaboration<br><b>Actions:</b><br><b>Cooperation/Collaboration:</b> Motivation to collaborate more with others                                                                                                                                                                                                                                                                                                                                                                                                                         | <b>Social development:</b> Connectedness (e.g., teamwork)                                                                                                                                                                                           | Social skills, Leadership, Group work, Participatory capacities |                |
|                           | <b>Reminiscing with other participants</b> |                                                                                                          |                                                                                                                                                                                                                                                                                                                                                                                                                                                                                                                                                                      |                                                                                                                                                                                                                                                     |                                                                 | Social Norms   |
|                           | <b>Sharing with nonparticipants</b>        |                                                                                                          |                                                                                                                                                                                                                                                                                                                                                                                                                                                                                                                                                                      |                                                                                                                                                                                                                                                     |                                                                 | Social Norms   |
| <b>Self development</b>   | <b>Self-efficacy</b>                       | <b>Self-Efficacy:</b> Belief in one’s own ability to achieve one’s goals and influence their environment | <b>Psychological and emotional development:</b> Mental health including positive self-regard (e.g., self-confidence); confidence in personal efficacy (e.g., how to enact change)                                                                                                                                                                                                                                                                                                                                                                                    | Locus of control, Environmental studies self-efficacy, Group locus of control, Self-confidence to act, Self-efficacy, Confidence in action skills, Empowerment, Perceptions of control for managing risks to the environment, Science self-efficacy | Efficacy                                                        |                |
|                           | <b>Self-esteem</b>                         | <b>Meaning/Identity:</b> A heightened sense of self-awareness, critical reflection, and purpose          |                                                                                                                                                                                                                                                                                                                                                                                                                                                                                                                                                                      | Self-esteem                                                                                                                                                                                                                                         |                                                                 |                |
|                           | <b>Traits</b>                              |                                                                                                          | <b>Psychological and emotional development:</b> Mental health including positive self-regard (e.g., self-confidence, open-mindedness); emotional self-regulation (e.g., patience, persistence, paying attention); coping skills (e.g., adaptability); mastery and achievement motivation (e.g., initiative, intrinsic reward); confidence in personal efficacy (e.g., how to enact change); ‘planfulness’ (e.g., vision, thinking ahead); sense of personal autonomy and responsibility; optimism coupled with realism; good use of time (e.g., balancing work load) | Disposition toward critical thinking, Ecological mindset, Intrinsic motivation, Autonomy, Character development, Maturity, Poise                                                                                                                    |                                                                 |                |
|                           | <b>Hobbies</b>                             |                                                                                                          |                                                                                                                                                                                                                                                                                                                                                                                                                                                                                                                                                                      |                                                                                                                                                                                                                                                     |                                                                 |                |
|                           | <b>Visions</b>                             |                                                                                                          |                                                                                                                                                                                                                                                                                                                                                                                                                                                                                                                                                                      |                                                                                                                                                                                                                                                     |                                                                 |                |
