# Supplementary material for: What Could and Should Ecological Civilization Education Be?
Source: MDPI journal article supplement (doi:10.3390/su132111735), 2021-10-24
Supplement: s1 [file s1]

Archive with 1 entries (1 files):
- sustainability-1387604-supplementary.pdf
